# Supplementary material for: Enhanced Antioxidant, Antiviral, and Anticancer Activities of the Extract of Fermented Egyptian Rice Bran Complexed with Hydroxypropyl-β-cyclodextrin
Source: PubMed Central journal article supplement — ACS Omega. 2022 Jun 1;7(23):19545–54. doi: 10.1021/acsomega.2c01281 (PMC9202066; doi:10.1021/acsomega.2c01281), 2022-06-01
Supplement: ao2c01281_si_001.pdf [file ao2c01281_si_001.pdf]

# Supplementary materials

## Enhanced Antioxidant, Antiviral, and Anticancer Activities of the Extract of Fermented Egyptian Rice Bran Complexed with HydroxyPropyl- $\beta$ -Cyclodextrin

Sherif Ashraf Fahmy<sup>1,2†</sup>, Khaled A. Nematallah<sup>3†</sup>, Noha Khalil Mahdy<sup>1</sup>, Hesham I. El-Askary<sup>4</sup>, Meselhy Ragab Meselhy<sup>4</sup>, Hassan Mohamed El-Said Azzazy<sup>1,\*</sup>

<sup>1</sup> Department of Chemistry, School of Sciences & Engineering, The American University in Cairo, AUC Avenue, PO. Box 74, New Cairo 11835, Egypt

<sup>2</sup> School of Life and Medical Sciences, University of Hertfordshire Hosted by Global Academic Foundation, R5 New Garden City, New Capital, Cairo 11835, Egypt

<sup>3</sup> Pharmacognosy and Microbiology department, Faculty of Pharmacy, the British University in Egypt.

<sup>4</sup> Department of Pharmacognosy, Faculty of Pharmacy, Cairo University, Egypt

† These authors contributed equally to this work

\* Correspondence: [hazzazy@aucegypt.edu](mailto:hazzazy@aucegypt.edu) (H.M.E.A.);

Tel.: +2 02 2615 2559; Fax: +2 02 2795 7565 (H.M.E.A.)

Print of all graphic windows

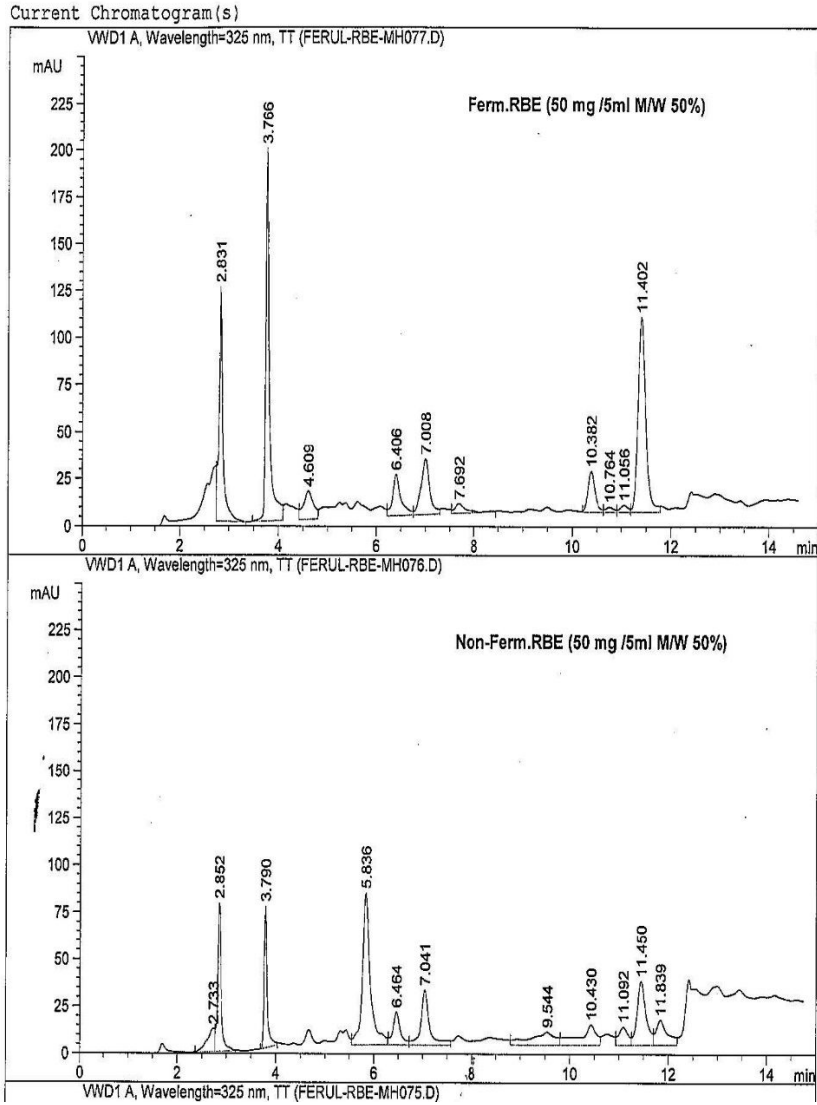

**Figure S1.** HPLC profiles of the methanolic extracts of fermented (FRBE) and non-fermented rice bran (RBE)

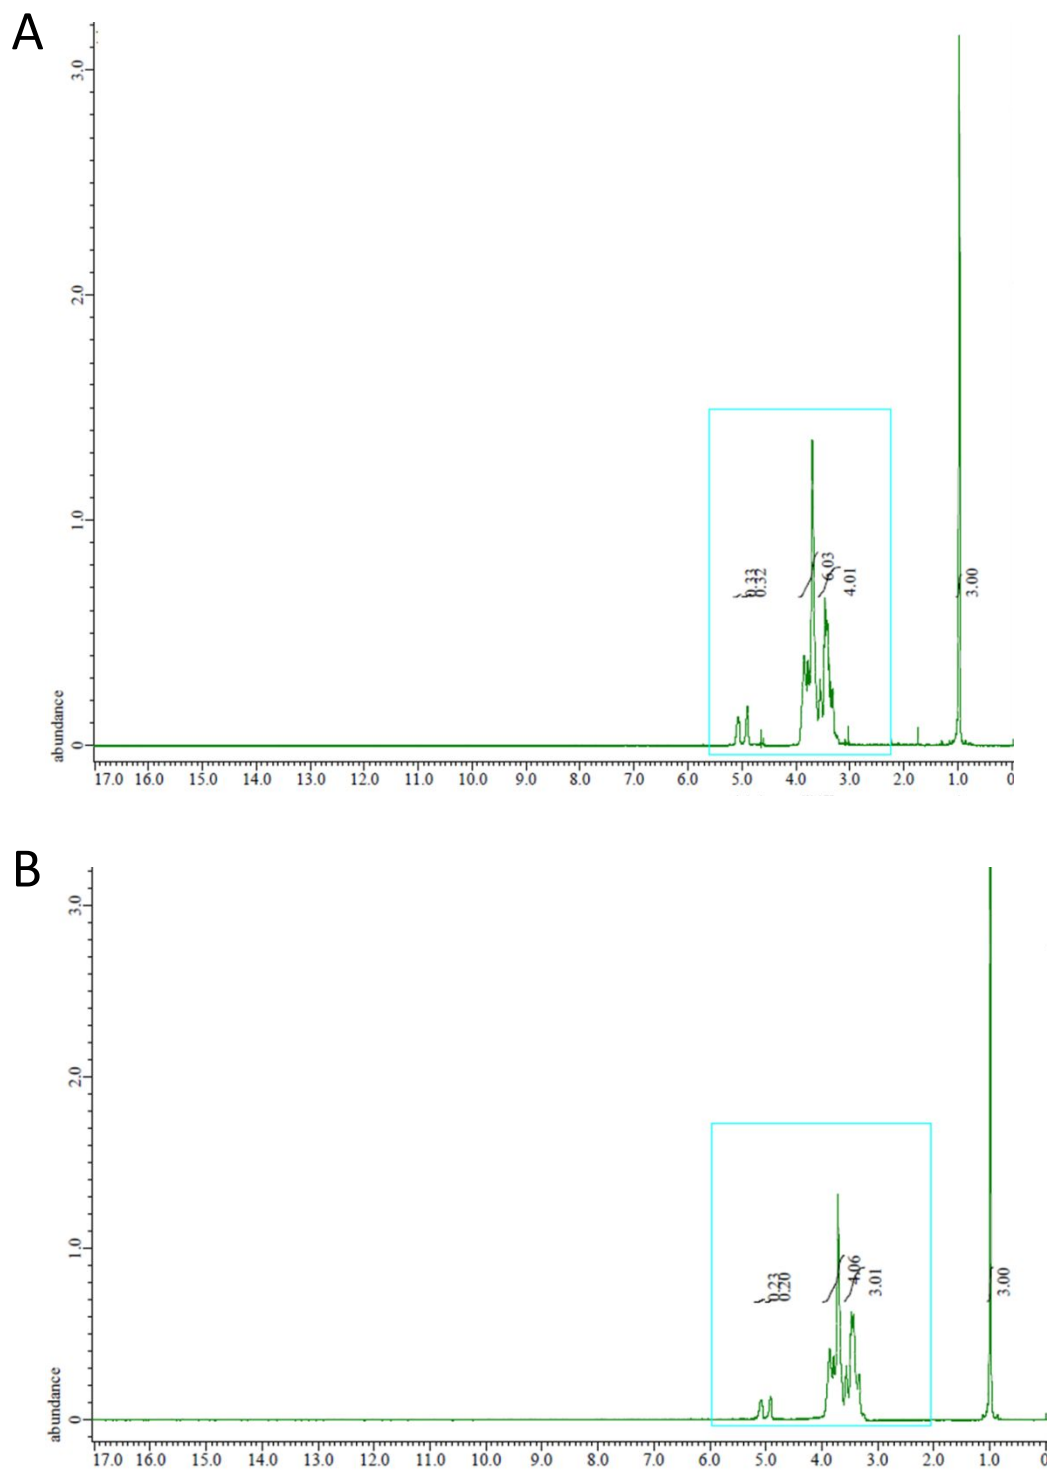

**Figure S2.**  $^1\text{H}$  NMR spectra of (A) HP $\beta$ CD, and (B) FRBE/HP $\beta$ CD complex.
